# Supplementary material for: Synthesis of tin oxide nanospheres under ambient conditions and their strong adsorption of As(iii) from water
Source: Royal Society of Chemistry journal article supplement (doi:10.1039/c5dt03259h), 2015-01-01
Supplement: c5dt03259h1.pdf [file c5dt03259h1.pdf]

**Synthesis of Tin Oxide Nanospheres under Ambient Conditions and Their Strong  
Adsorption of As(III) from Water**

Ge Zhang<sup>a,†</sup>, Wuzhu Sun<sup>a,†</sup>, Lingmei Liu<sup>a</sup>, Weiyi Yang<sup>a</sup>, Zhengchao Xu<sup>b</sup>, Qi Li<sup>a,\*</sup>,  
and Jian Ku Shang<sup>c</sup>

<sup>a</sup>*Environment Functional Materials Division*

*Shenyang National Laboratory for Materials Science*

*Institute of Metal Research, Chinese Academy of Sciences, Shenyang, 110016, P. R. China*

<sup>b</sup>*Zhangjiagang Green Tech Environmental Protection Equipment Co., LTD.*

*Zhangjiagang, Jiangsu Province, 215625, P. R. China*

<sup>c</sup>*Department of Materials Science and Engineering*

*University of Illinois at Urbana-Champaign, Urbana, IL 61801, USA*

†These authors contributed equally to this work.

\*Corresponding author.

E-mail address: [qili@imr.ac.cn](mailto:qili@imr.ac.cn).

Phone: +86-24-83978028, Fax: +86-24-23971215.

Postal address: 72 Wenhua Road, Shenyang, Liaoning Province, 110016, P. R. China.

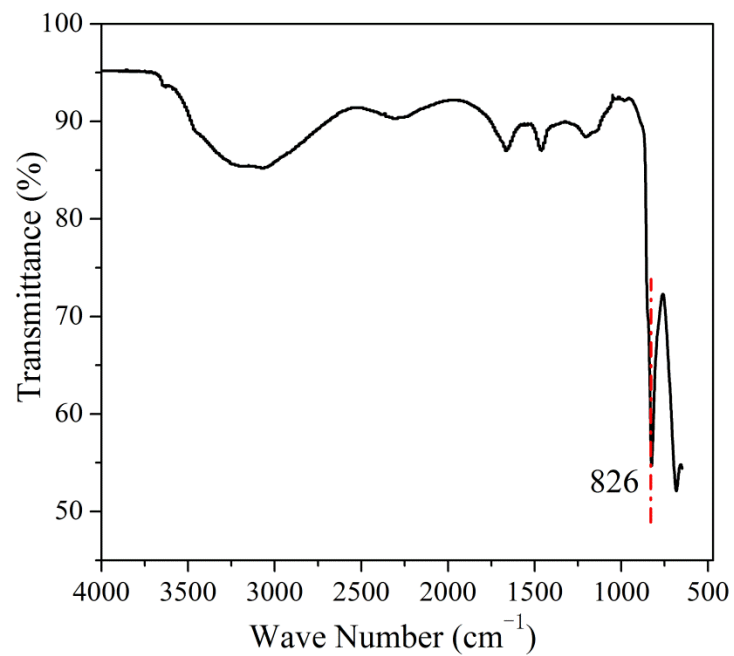

**Fig. S1.** FTIR spectrum of the dissolved arsenite species in water. Its uncomplexed As(III)-O bond was determined at  $\sim 826 \text{ cm}^{-1}$ .
